# Supplementary material for: Synergistic modulation of cyclobutane pyrimidine dimer photoproduct formation and deamination at a TmCG site over a full helical DNA turn in a nucleosome core particle
Source: PubMed Central journal article supplement (PMC4245940; doi:10.1093/nar/gku1049), 2014-11-11
Supplement: supp_gku1049_nar-02004-d-2014-File009.pdf [file supp_gku1049_nar-02004-d-2014-File009.pdf]

**Supplementary Information for:**

**Synergistic Modulation of Cyclobutane Pyrimidine Dimer Photoproduct Formation and Deamination at a T<sup>m</sup>CG Site Over a Full Helical DNA Turn in a Nucleosome Core Particle**

Qian Song<sup>1</sup>, Vincent J. Cannistraro<sup>1</sup>, and John-Stephen Taylor<sup>1,\*</sup>

Department of Chemistry, Washington University, St. Louis, MO 63130

\*To whom correspondence should be addressed. Tel: +1 314 935 6721; Fax: +1 314 935 4481;

Email: taylor@wustl.edu

---

| <b>Figure</b>                                                                                                                          | <b>Page</b> |
|----------------------------------------------------------------------------------------------------------------------------------------|-------------|
| Table S1. Common ODN sequences for all ligations:                                                                                      | S3          |
| Table S2. ODNs for 147-mer ds1-10                                                                                                      | S4          |
| Table S3. ODNs for 147-mer ds6A                                                                                                        | S7          |
| Figure S1. Ligation scheme for preparing 147-mers containing rotation-specific T <sup>m</sup> CG sites.                                | S8          |
| Figure S2. Reconstitution of the nucleosome core particles with the 147-mer DNA duplexes.                                              | S9          |
| Figure S3. Hydroxyl radical footprinting of the nucleosome core particles and DMS sequencing of the DNA 147-mer duplexes.              | S10         |
| Figure S4. Deamination rates of T= <sup>m</sup> C CPD in nucleosome-bound ds1-10 and free ds1-10 combined.                             | S11-12      |
| Figure S5. Deamination rate of T= <sup>m</sup> CA CPD in nucleosome-bound and nucleosome-free ds1A & 6A .                              | S14         |
| Figure S6. Relative orientation between adjacent C5-C6 bonds in T-tracts derived from crystal structures of nucleosome core particles. | S15         |
| Figure S7. Temperature factors for the nucleotides in 3UT9.pbd corresponding to the <sup>m</sup> C positions in the current study.     | S16         |

---

**Table S1. Common ODN sequences for all ligations:**

**Top strand (ts):**

| ODN | Sequence                                        |
|-----|-------------------------------------------------|
| ts1 | AGT TAT GTT AGA GCC TGT AAC TCG GTG TTA GAG CCT |
| ts4 | CGG TGT TAG AGC CTG TAA CTC GGT GTT AGA GCC TG  |

**Top strand ligation scaffolds (tls)**

| ODN   | Sequence                   |
|-------|----------------------------|
| tls12 | ACC GAG TTA CAG GCT CTA AC |
| tls34 | TCT AAC ACC GAG TTA CAG GC |

**Bottom strand (bs)**

| ODN | Sequence                                            |
|-----|-----------------------------------------------------|
| bs1 | CAG GCT CTA ACA CCG AGT TAC AGG CTC TAA CAC CGA GTT |
| bs3 | CAC CGA GTT ACA GGC TCT AAC ACC GAG TT              |
| bs4 | ACA GGC TCT AAC ACC GAG TTA CAG GCT CTA ACA TAA CT  |

**Bottom strand ligation scaffolds (bls)**

| ODN         | Sequence              |
|-------------|-----------------------|
| bls12/bls34 | TAGAGCCTGTA ACTCGGTGT |

**Table S2. Specific ODNs for 147-mer ds1-10**

| ODN     | Sequence                                                               |
|---------|------------------------------------------------------------------------|
| ts2_1   | GTA ACT CGG TGT TAG AGC CTG TAA CTC GGT GTA T                          |
| ts3_1   | <sup>m</sup> CG ATG GTA TAG AGC CTG TAA CAG AAT GTT AGA GCC TGT AAC T  |
| tls23_1 | TAT ACC ATC GAT ACA CCG AG                                             |
| bs2_1   | ACA GGC TCT AAC ATT CTG TTA CAG GCT CTA TAC CAT CGA TA                 |
| bls23_1 | TAA CTC GGT GTA TCG ATG GT                                             |
| ts2_2   | GTA ACT CGG TGT TAG AGC CTG TAA CTC GGT GAT AT                         |
| ts3_2   | <sup>m</sup> CG ATA TGT ATA GCC TGT AAC AGA ATG TTA GAG CCT GTA ACT    |
| tls23_2 | ATA CAT ATC GAT TAC ACC GA                                             |
| bs2_2   | ACA GGC TCT AAC ATT CTG TTA CAG GCT ATA CAT ATC GAT AT                 |
| bls23_2 | TAA CTC GGT GAT ATC GAT TA                                             |
| ts2_3   | GTA ACT CGG TGT TAG AGC CTG TAA CTC GGT GTA TAT                        |
| ts3_3   | <sup>m</sup> CG ATA TGT AAG CCT GTA ACA GCC TGT TAG AGC CTG TAA CT     |
| tls23_3 | TTA CAT ATC GAT ATA CAC CG                                             |
| bs2_3   | ACA GGC TCT AAC AGG CTG TTA CAG GCT TAC ATA TCG ATA TA                 |
| bls23_3 | TAA CTC GGT GTA TAT CGA TA                                             |
| ts2_4   | GTA ACT CGG TGT TAG AGC CTG TAA CTC GGT GAT ACA T                      |
| ts3_4   | <sup>m</sup> CG TGT ATG AGC CTG TAA CAG CCT GTT AGA GCC TGT AAC T      |
| tls23_4 | CAC ATA CAC GAT GTA TCA CC                                             |
| bs2_4   | ACA GGC TCT AAC AGG CTG TTA CAG GCT CAT ACA CGA TGT AT                 |
| bls23_4 | TAA CTC GGT GAT ACA TCG TG                                             |
| ts2_5   | GTA ACT CGG TGT TAG AGC CTG TAA CTC GGT <u>GTA TGT AT</u>              |
| ts3_5   | <sup>m</sup> CG ATA <u>GTA</u> GCC TGT AAC AGC CTG TTA GAG CCT GTA ACT |
| tls23_5 | GCT ACT ATC GAT ACA TAC AC                                             |
| bs2_5   | ACA GGC TCT AAC AGG CTG TTA CAG GCT ACT ATC GAT ACA TA                 |
| bls23_5 | TAA CTC GGT GTA TGT ATC GA                                             |

---

|         |                                                                      |
|---------|----------------------------------------------------------------------|
| ts2_6   | GTA ACT CGG TGT TAG AGC CTG TAA CTC GGT <u>GAT GAT GAT</u>           |
| ts3_6   | <u><sup>m</sup>CG TAT GAG</u> CCT GTA ACA GCC TGT TAG AGC CTG TAA CT |
| tls23_6 | GGC TCA TAC GAT CAT CAT CA                                           |
| bs2_6   | ACA GGC TCT AAC AGG CTG TTA CAG GCT CAT ACG ATC ATC AT               |
| bls23_6 | TAA CTC GGT GAT GAT GAT CG                                           |

---

|         |                                                               |
|---------|---------------------------------------------------------------|
| ts2_7   | GTA ACT CGG TGT TAG AGC CTG TAA CTC GGT GTA TAT GCA T         |
| ts3_7   | <sup>m</sup> CG TAC AGC CTG TAA CAG CCT GTT AGA GCC TGT AAC T |
| tls23_7 | AGG CTG TAC GAT GCA TAT AC                                    |
| bs2_7   | ACA GGC TCT AAC AGG CTG TTA CAG GCT GTA CGA TGC ATA TA        |
| bls23_7 | TAA CTC GGT GTA TAT GCA TC                                    |

---

|         |                                                             |
|---------|-------------------------------------------------------------|
| ts2_8   | GTA ACT CGG TGT TAG AGC CTG TAA CTC GGT GAT ACG CACA T      |
| ts3_8   | <sup>m</sup> CG TAA GCC TGT AAC AGC CTG TTA GAG CCT GTA ACT |
| tls23_8 | CAG GCT TAC GAT GTG CGT AT                                  |
| bs2_8   | ACA GGC TCT AAC AGG CTG TTA CAG GCT TAC GAT GTG CGT AT      |
| bls23_8 | TAA CTC GGT GAT ACG CAC AT                                  |

---

|         |                                                            |
|---------|------------------------------------------------------------|
| ts2_9   | GTA ACT CGG TGT TAG AGC CTG TAA CTC GGT GTA TGT AGA CAT    |
| ts3_9   | <sup>m</sup> CG CAG CCT GTA ACA GCC TGT TAG AGC CTG TAA CT |
| tls23_9 | ACA GGC TGC GAT GTC TAC AT                                 |
| bs2_9   | ACA GGC TCT AAC AGG CTG TTA CAG GCT GCG ATG TCT ACA TA     |
| bls23_9 | TAA CTC GGT GTA TGT AGA CA                                 |

---

|          |                                                           |
|----------|-----------------------------------------------------------|
| ts2_10   | GTA ACT CGG TGT TAG AGC CTG TAA CTC GGT GAT ACG CAC GTA T |
| ts3_10   | <sup>m</sup> CG AGC CTG TAA CAG CCT GTT AGA GCC TGT AAC T |
| tls23_10 | TAC AGG CTC GAT ACG TGC GT                                |
| bs2_10   | ACA GGC TCT AAC AGG CTG TTA CAG GCT CGA TAC GTG CGT AT    |
| bls23_10 | TAA CTC GGT GAT ACG CAC GT                                |

---

**Table S3. ODNs for 147-mer ds-1A**

| ODN      | Sequence                                                              |
|----------|-----------------------------------------------------------------------|
| ts2_1A   | GTA ACT CGG TGT TAG AGC CTG TAA CTC GGT GTA T                         |
| ts3_1A   | <sup>m</sup> CA ATG GTA TAG AGC CTG TAA CAG AAT GTT AGA GCC TGT AAC T |
| tls23_1A | TAT ACC ATT GAT ACA CCG AG                                            |
| bs2_1A   | ACA GGC TCT AAC ATT CTG TTA CAG GCT CTA TAC CAT TGA TA                |
| bls23_1A | TAA CTC GGT GTA TCA ATG GT                                            |
| ts2_6A   | GTA ACT CGG TGT TAG AGC CTG TAA CTC GGT GAT GAT GAT                   |
| ts3_6A   | <sup>m</sup> CA TAT GAG CCT GTA ACA GCC TGT TAG AGC CTG TAA CT        |
| ts23_6A  | GGC TCA TAT GAT CAT CAT CA                                            |
| bs2_6    | ACA GGC TCT AAC AGG CTG TTA CAG GCT CAT ATG ATC ATC AT                |
| bls23_6  | TAA CTC GGT GAT GAT GAT CA                                            |

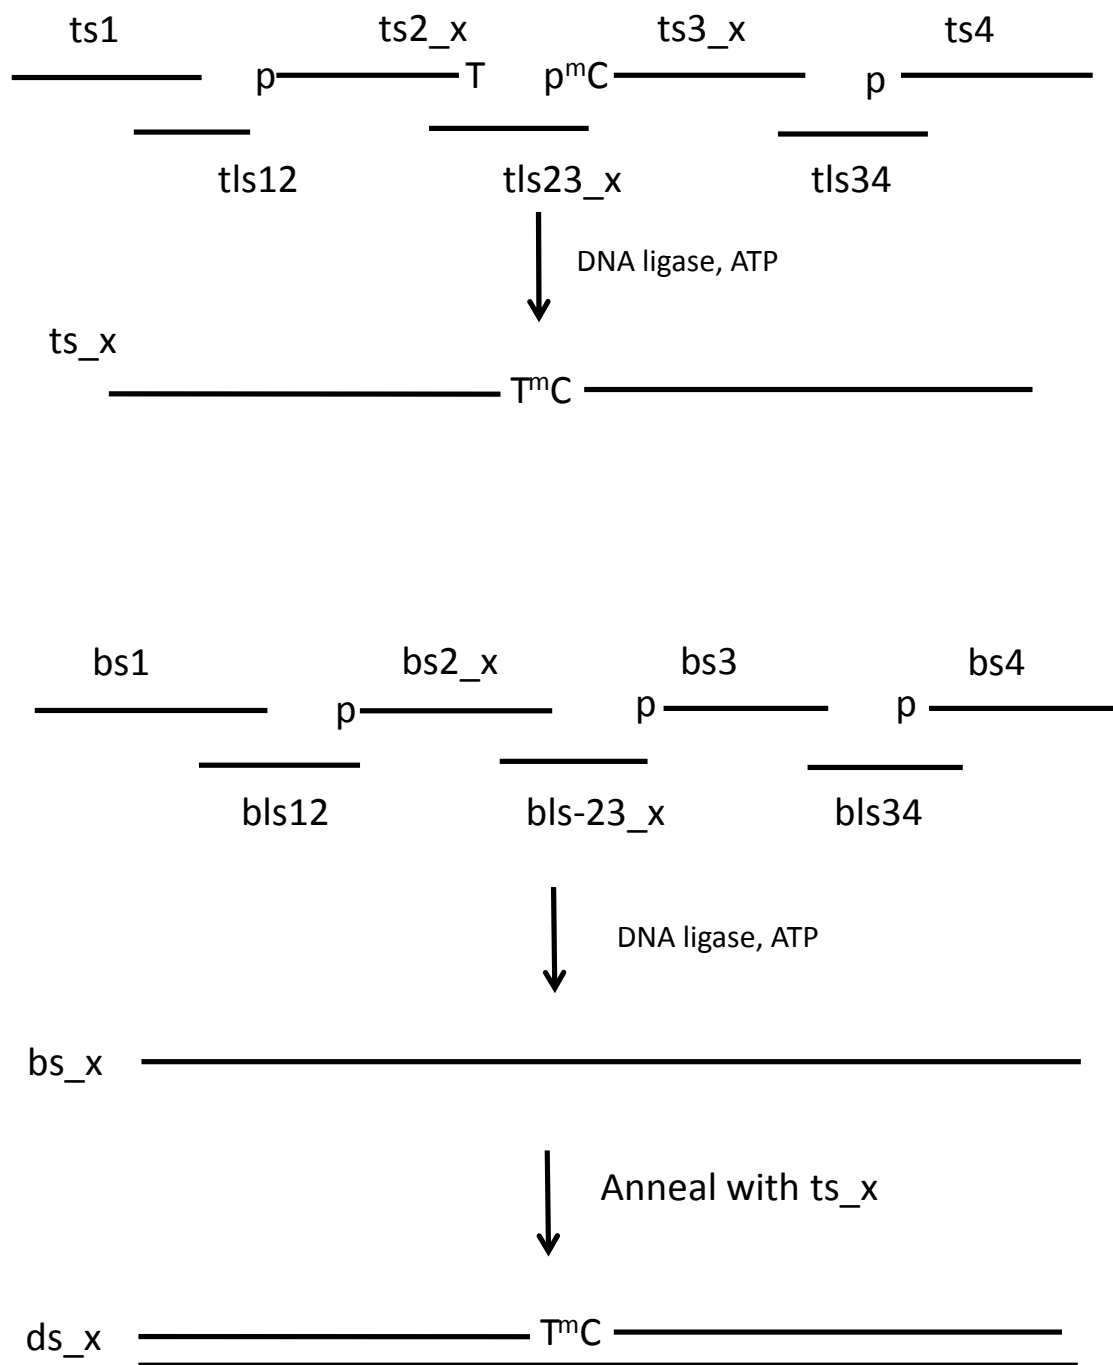

**Figure S1. Ligation scheme for preparing 147-mers containing rotation-specific  $T^mCG$  sites.** The  $T^mC$  of the CPD site could be specifically  $^{32}P$ -radiolabeled by treatment of unphosphorylated ODN ts3\_x with  $\gamma$ - $^{32}P$ -ATP and kinase.

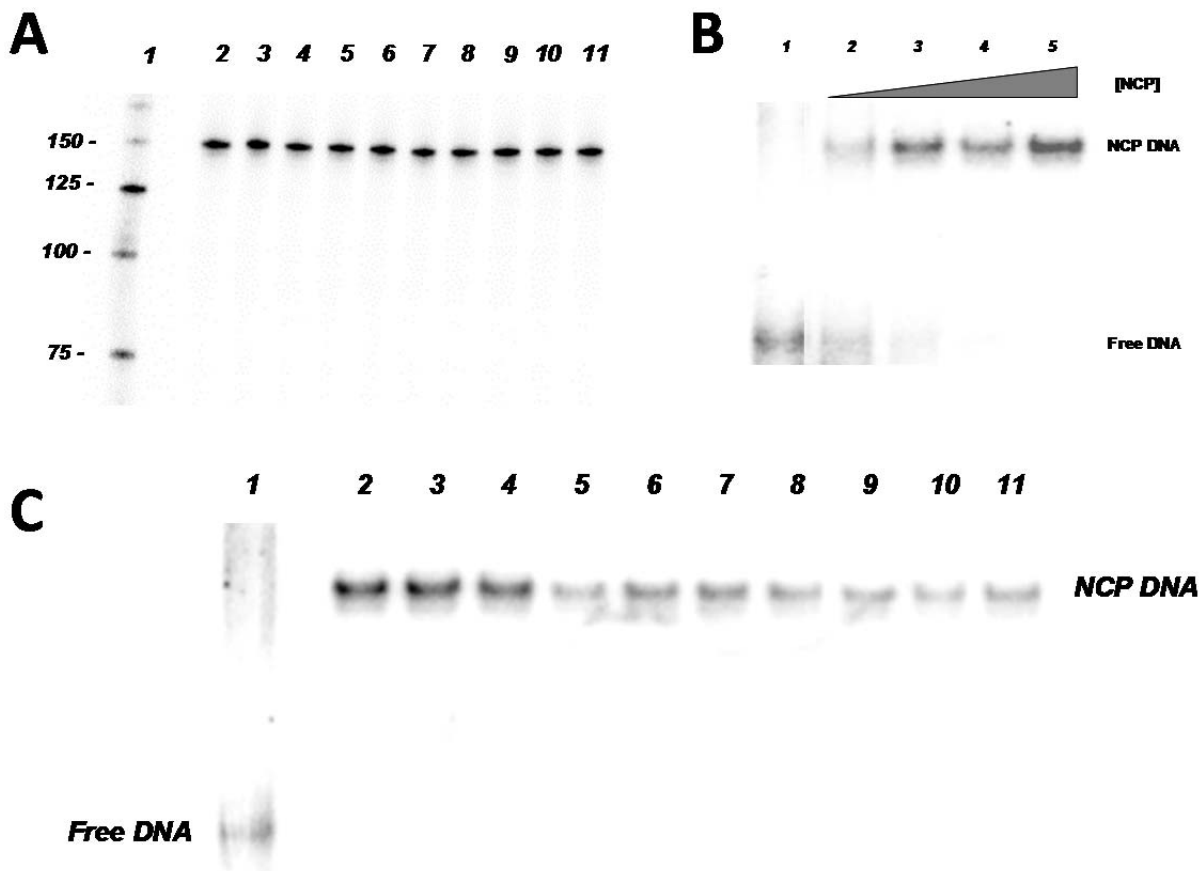

**Figure S2. Reconstitution of the nucleosome core particles with the 147-mer DNA duplexes.** A) The PAGE-purified single strand 147-mers were annealed together to form duplexes and characterized by native gel electrophoresis on a 10% acrylamide, 0.3% bisacrylamide polyacrylamide gel in TBE. Lane 1: 25 bp DNA ladder, lane 2-11: 147-mer ds1-10. Each duplex substrate was isolated from the gel for further studies B) An equimolar mixture of the ten 147-mer DNA duplexes ds1-10 (10 nM duplex DNA) was incubated with increasing amounts of chicken erythrocyte nucleosome core particle (NCP) (lanes 1-4: 100, 300, 500, 1000 nM) at room temperature in 2 M NaCl at pH 7.5 for 2 h followed by dialysis overnight at 4°C in 50 mM NaCl, with final equilibration at 55°C for 2 h. The reconstituted NCP were then electrophoresed on a native polyacrylamide gel (6% acrylamide, 0.2% bisacrylamide in TBE). C) Individual 147-mer DNA duplexes ds1-10 (10 nM each) were incubated with 1000 nM chicken erythrocyte nucleosome core particles (NCP) at room temperature in 2 M NaCl at pH 7.5 for 2 h followed by dialysis overnight at 4°C in 50 mM NaCl, with final equilibration at 55°C for 2 h. The reconstituted NCP were then electrophoresed on a native polyacrylamide gel (6% acrylamide, 0.2% bisacrylamide in TBE). Lane 1: free 147-mer DNA duplex, Lane 2-11: reconstituted nucleosome-bound ds1-10.

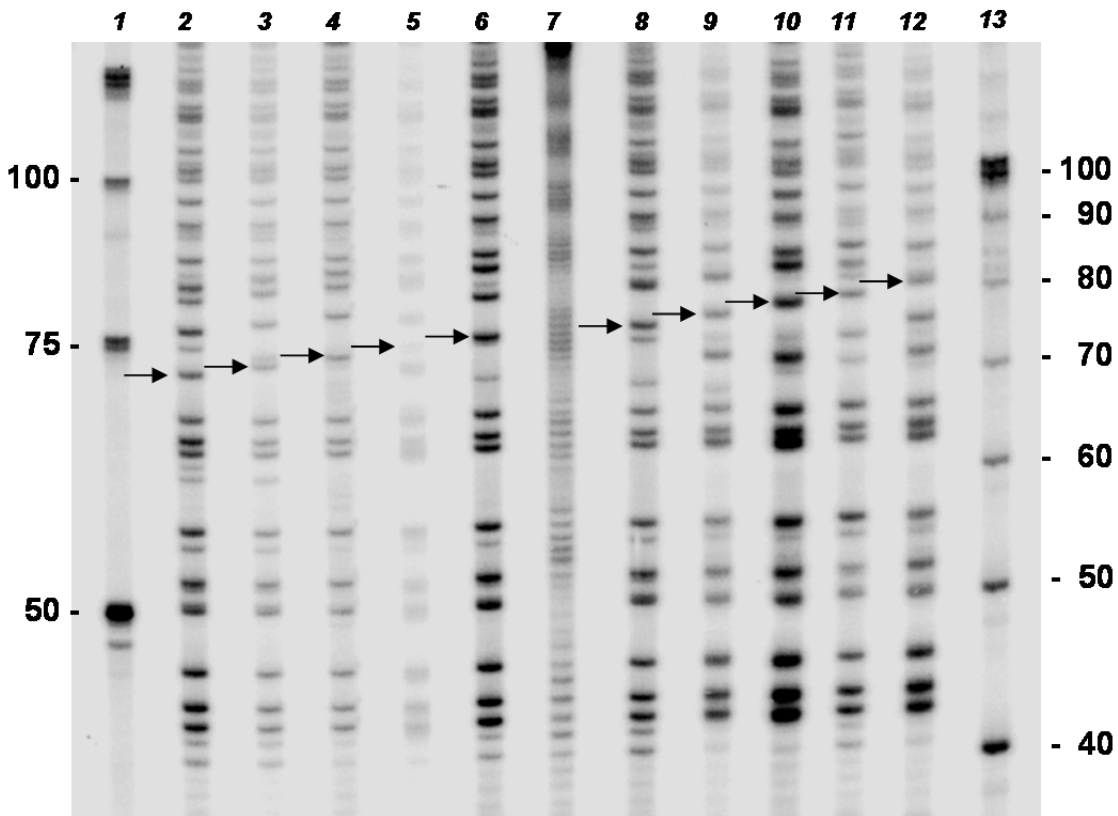

**Figure S3. Hydroxyl radical footprinting of the nucleosome core particles and DMS sequencing of the DNA 147-mer duplexes.** The nucleosome core particle was reconstituted with an equimolar mixture of 5'-end-labeled 147-mer DNA duplexes ds1-10 and then subjected to hydroxyl radical footprinting and electrophoresis on a 7 M urea, 10% acrylamide, 0.3% bisacrylamide denaturing gel. Lane 1, 25 bp DNA ladder; lane 2 to 6, Maxam Gilbert G reaction on ds1-5; lane 7, hydroxyl radical footprinting of the reconstituted nucleosome core particle with the equimolar mixture of the ten 147-mer DNA duplexes ds1-10; lane 8 to 12, Maxam Gilbert G reaction on ds6-10; lane 13, 10 bp DNA ladder. Arrows point to the G of the T<sup>m</sup>CG sites in ds1-10.



ds1

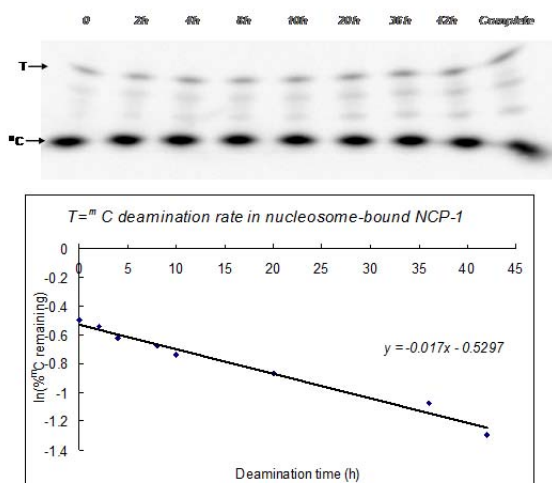

ds2

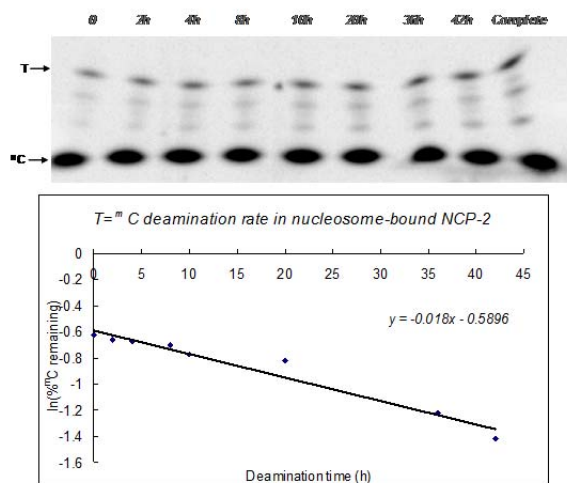

ds3

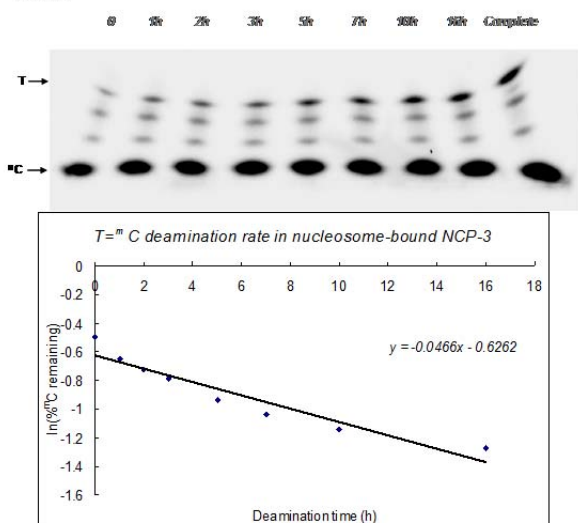

ds4

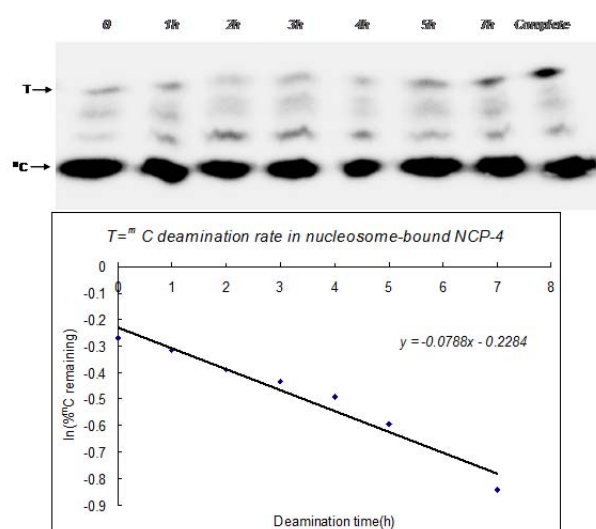

**Figure S4. Deamination rates of  $T=^m C$  CPD in nucleosome-bound ds1-10 and free ds1-10 combined.** Gel electrophoresis of the NP degradation products of the photoreverted DNA as a function of deamination time. Plots of the fraction  $^m C$  remaining in the  $T^m C$  CPD vs time.

ds5

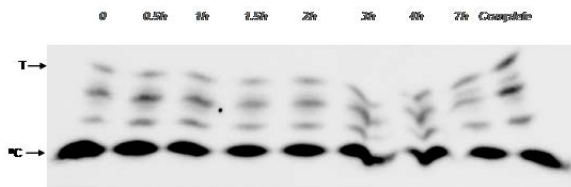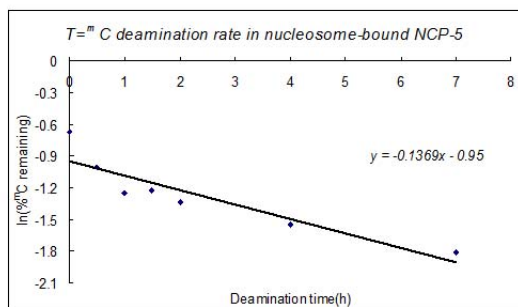

ds6

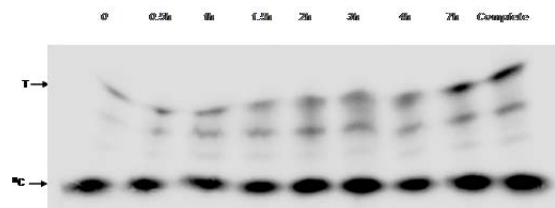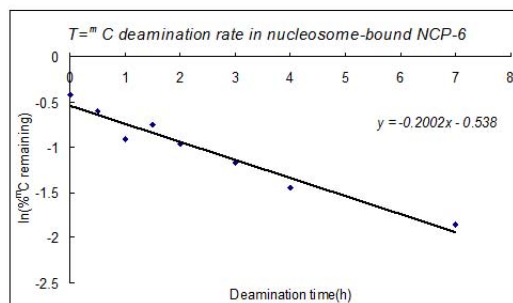

ds7

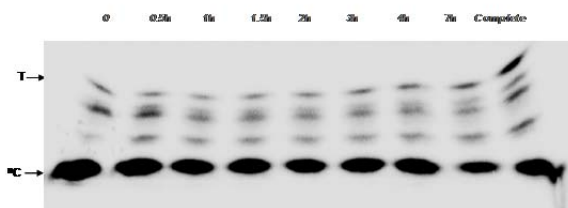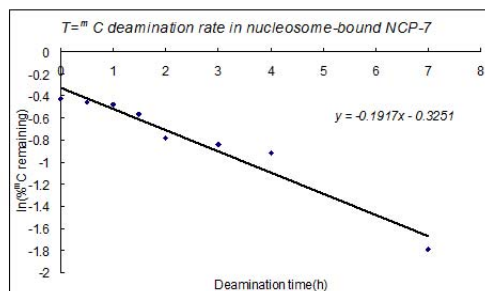

ds8

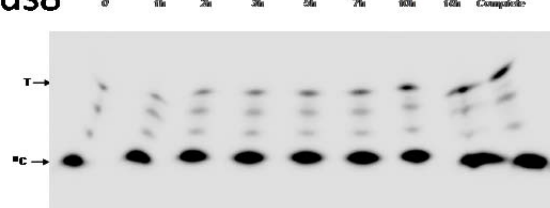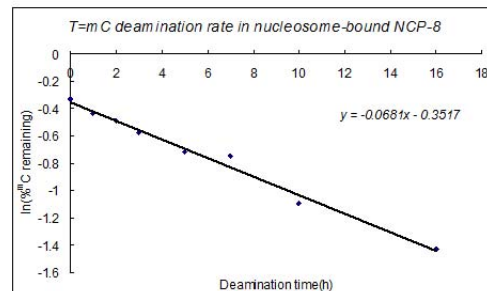

Figure S4 (cont.)

ds9

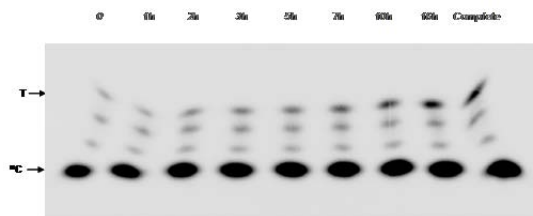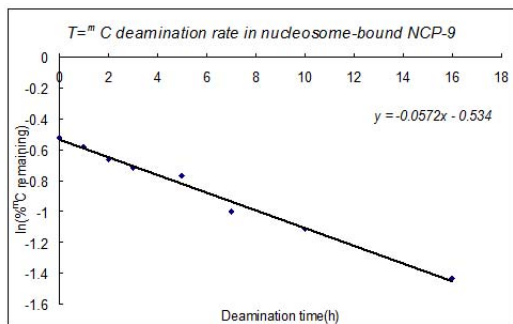

ds10

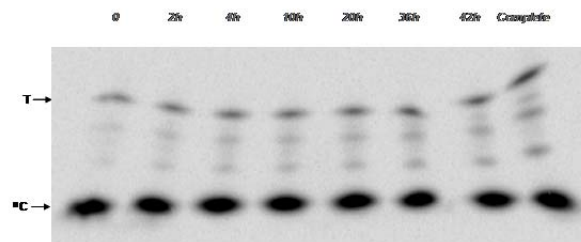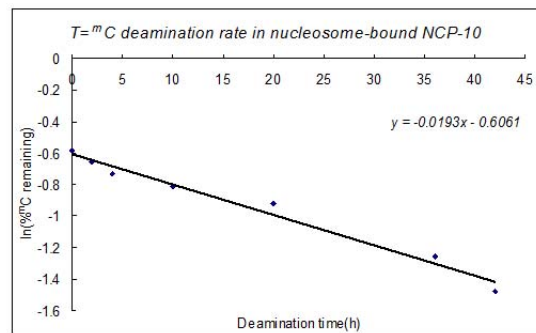

ds1-10 Free

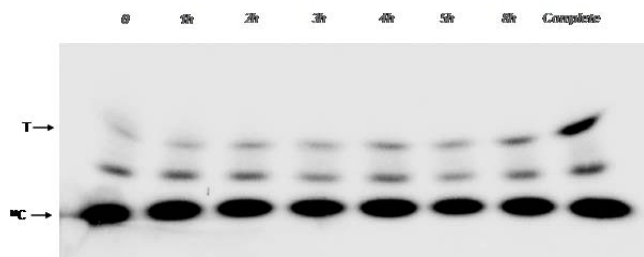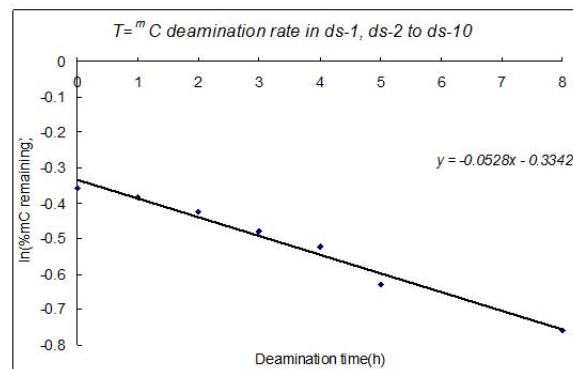

Figure S4 (cont.)

ds1A

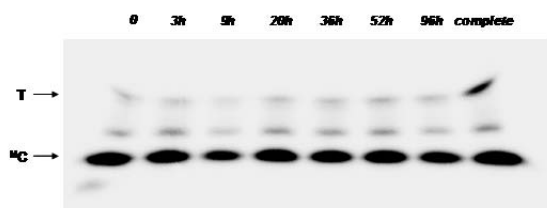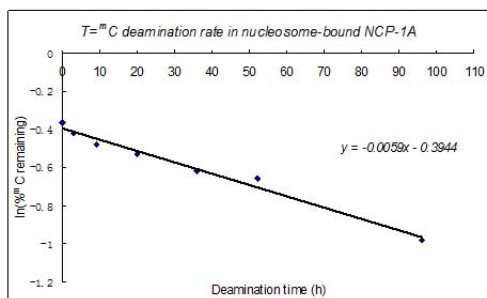

ds6A

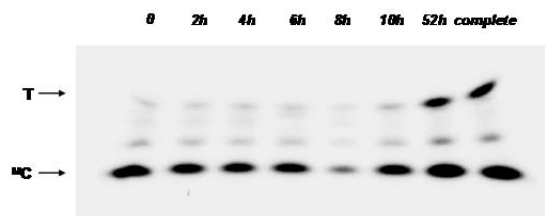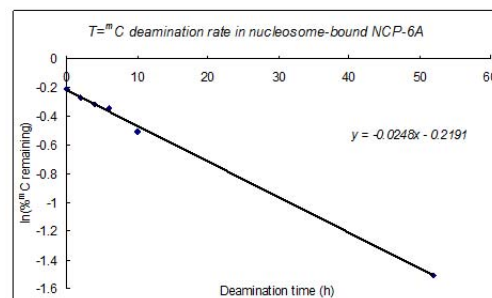

ds1A Free

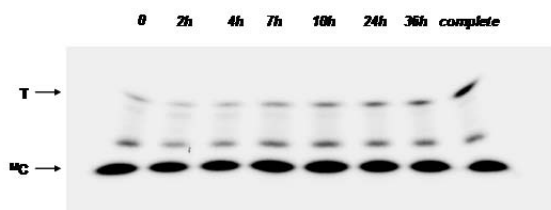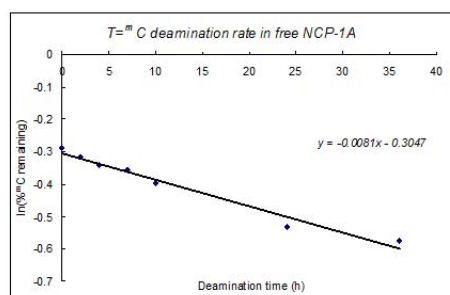

ds6A Free

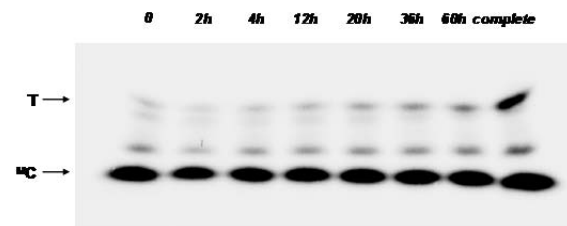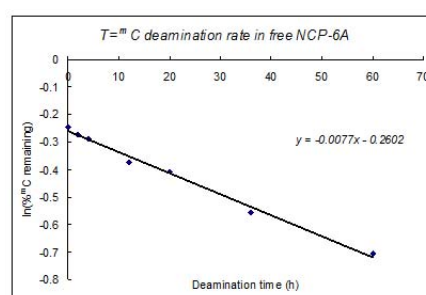

**Figure S5. Deamination rate of  $T=^mCA$  CPD in nucleosome-bound and nucleosome-free ds1A & 6A . Gel electrophoresis of the NP degradation products of the photoreverted DNA as a function of deamination time. Plots of the log fraction  $^mC$  in  $T=^mC$  remaining vs time.**

**A.**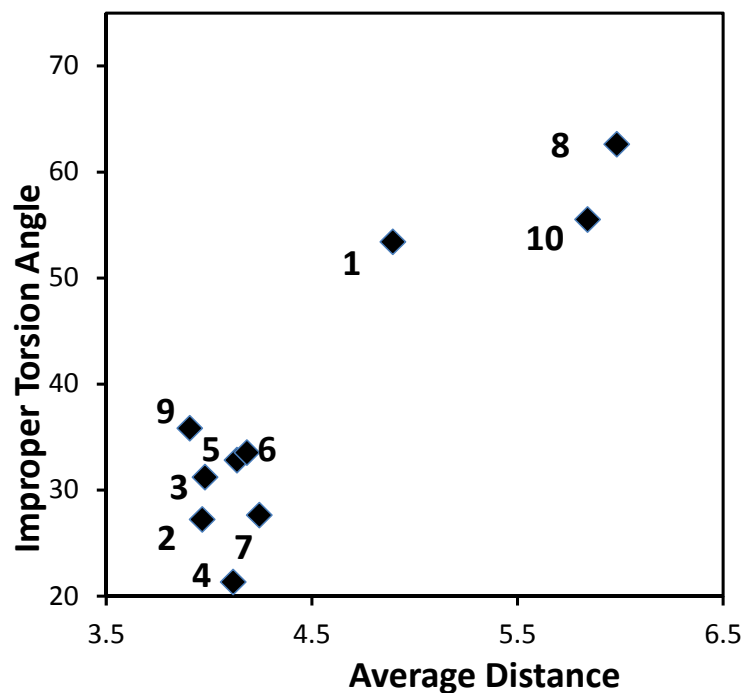**B.**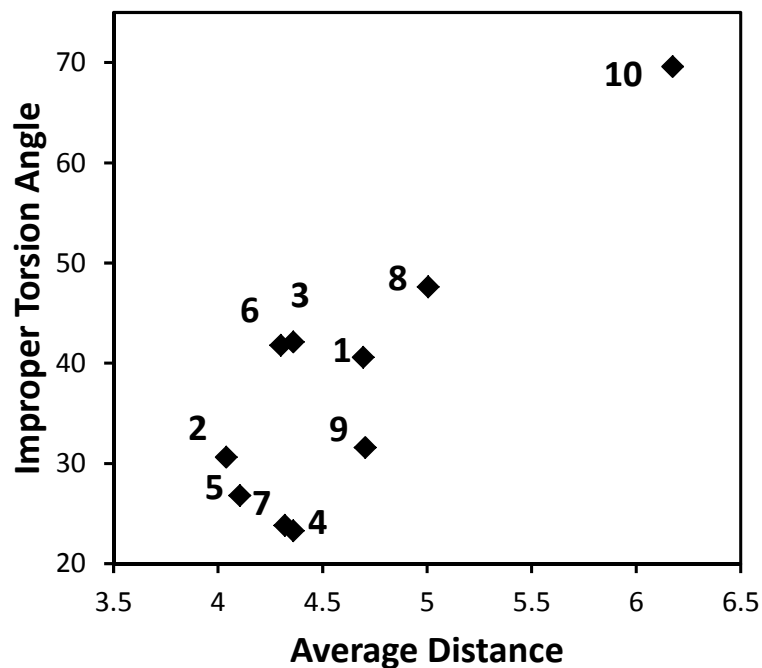

**Figure S6. Relative orientation between adjacent C5-C6 bonds in T-tracts derived from crystal structures of nucleosome core particles.** The bases from -5 to +6 in A) 1KX5.pdb and B) 3UT9.pdb were converted to T-tracts and the average distance between the centers of the C5-C6 bonds and improper torsion angle C6-C5-C5'-C6' of adjacent thymidines were plotted against each other.

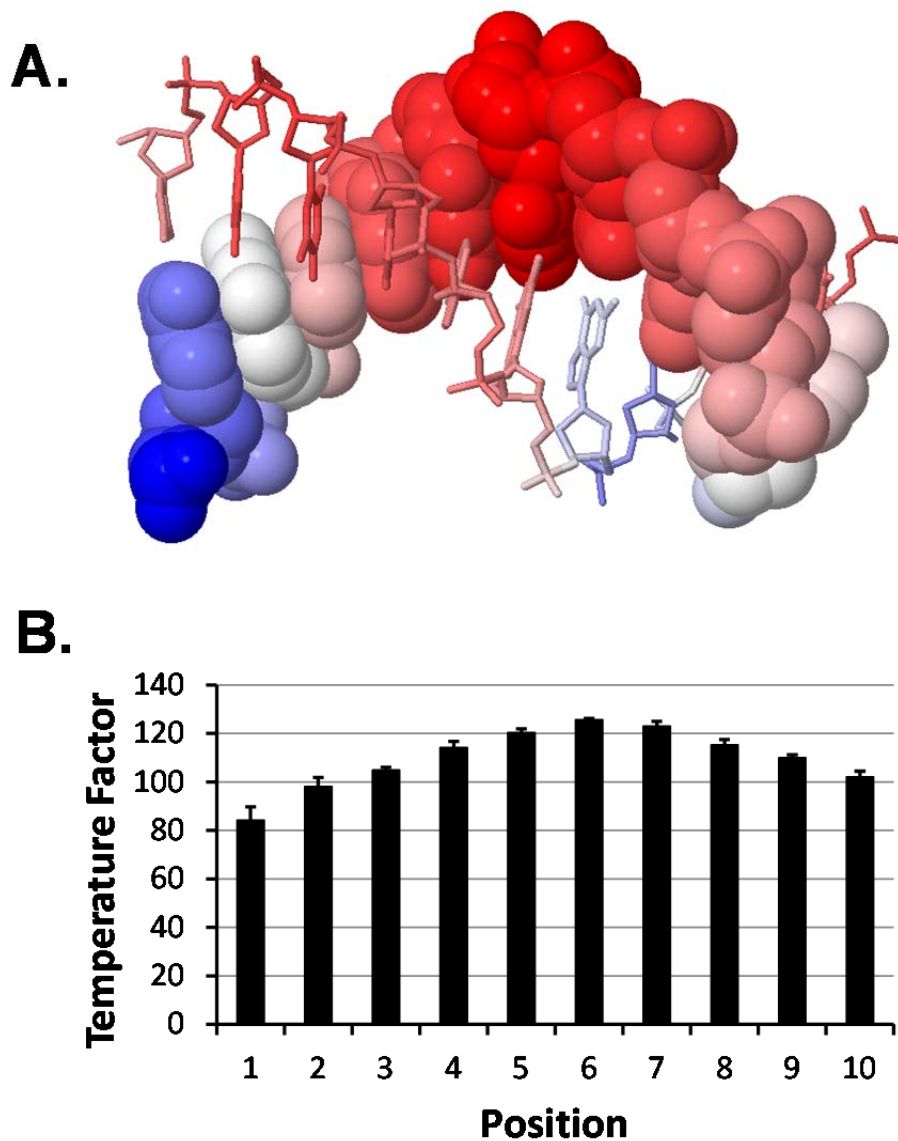

**Figure S7. Temperature factors for the nucleotides in 3UT9.pdb corresponding to the  $^{13}\text{C}$  positions in the current study.** A) CPK image of the  $^{13}\text{C}$ -containing strand and wireframe image of the complementary strand for the nucleotides in 3UT9.pdb corresponding to the numbered  $^{13}\text{C}$  sites in the present study. Blue corresponds to the lowest temperature factor and red to the highest temperature factor in the range. B) Histogram of the temperature factors for the averaged temperature factor for all atoms of a single nucleotide.
